33 The aim of the systematic review will be to critically appraise the empirical evidence that  
34 examined preterm birth and father's mental health during the perinatal period.

### 35 **Design**

36 Systematic review

### 37 **Methods**

38 The review will be guided by the PRISMA reporting process. Electronic databases Medline,  
39 CINAHL, the Cochrane Library, PsycARTICLES, PsycINFO, Psychology and Behavioural Sciences  
40 Collections will be searched to identify studies that meet the inclusion criteria. Studies that  
41 researched preterm birth during the perinatal period will be included if fathers mental health  
42 was the principal focus of the research, if fathers mental health was in the title and/or aim of  
43 the study or if fathers mental health was an outcome or dependent variable. Data will be  
44 extracted and presented in narrative form including tables and figures.

### 45 **Trial registration**

46 Trial registration: the protocol for this systematic review has been registered in PROSPERO  
47 [CRD42024536317].

48 [https://www.crd.york.ac.uk/prospero/display\\_record.php?RecordID=536317](https://www.crd.york.ac.uk/prospero/display_record.php?RecordID=536317)

### 49 **Keywords**

50 fathers, perinatal period, mental health, preterm birth, prematurity, neonatology, systematic  
51 review, protocol

### 52 **Introduction**

53 The perinatal period, which covers the time when a man's partner becomes pregnant through  
54 to the first year after birth is marked by significant change and the absence of routine [1].  
55 While most of these changes are expected and welcome, others can be unanticipated [2].  
56 Despite the evidence that fatherhood has a long-term positive and protective effect on men's  
57 health, there is also evidence that fatherhood in the perinatal period can be complex and  
58 demanding [3]. Fatherhood, even when desirable and planned, can be challenging [4]. The  
59 challenging nature of fatherhood during the perinatal period can be further compounded by  
60 the experience of preterm birth (PTB) [5].

61 PTB, defined as a birth occurring before 37 completed weeks of gestation, is a major perinatal  
62 health problem and the leading cause in perinatal morbidity and mortality worldwide [6,7].

63 The PTB rate is estimated at 11% or 15 million annually worldwide, [6], with a prevalence  
64 varying from 4% to 18% [6].

65 Preterm birth is one of the most common reason for admission to a neonatal intensive care  
66 unit (NICU) and means the start of an emotional, difficult and stressful period for parents [5].  
67 Preterm birth has been associated with symptoms of depression, anxiety and post-traumatic  
68 stress [8]. A recent meta-analyse found a higher risk for adverse mental health outcomes for  
69 mothers of preterm infants [9]. Preterm birth has also an impact on the mental health of  
70 fathers [10]; however, as no attempt has been made to systematically review studies that  
71 have examined preterm births and father's mental health during the perinatal period it is  
72 currently not known how common or significant the impact of a preterm birth is on father's  
73 mental health during this life stage.

74 To date, research examining paternal perinatal mental health has primarily focused on  
75 depression, with less attention given to stress and anxiety [1]. More recently, there has been  
76 a shift towards focusing on stress and anxiety, the evidence suggests all three are highly  
77 correlated [11]. Other areas of mental health that have received little attention regarding  
78 fathers during the perinatal period include Post Traumatic Stress Disorder (PTSD), Obsessive  
79 Compulsive Disorder (OCD), and Substance Use [1].

80 Reported rates of adverse paternal perinatal mental health outcomes are significant;  
81 however, they are likely to be under representative of the true prevalence as there is a  
82 gendered context in men underreporting mental health symptoms, leading to  
83 underdiagnoses [1]. Despite the potential of underreporting the prevalence rates represents  
84 a significant public health concern. To date, systematic reviews have been completed on  
85 paternal perinatal stress, and anxiety a depression with prevalence rates reported between

86 6% to 68.8%, 2.4% to 51% and 8.4% respectively. [11, 12, 13]. Risk factors associated with  
87 adverse paternal perinatal mental health have also been investigated. Philpott [1] suggests  
88 that understanding risk factors helps identify fathers who are likely to develop adverse mental  
89 health outcomes during the perinatal period and the evidence suggests that adverse  
90 outcomes can relate to personal, maternal, infant, relationship, socioeconomic and  
91 environmental factors. One such risk factor is having a preterm birth/infant [10]. To date, no  
92 attempt has been made to systematically review studies that have examined preterm births  
93 and father's mental health during the perinatal period; therefore, it is currently not known  
94 how common or significant the impact of a preterm birth is on father's mental health during  
95 this life stage.

96 A systematic review will give a better understanding of the impact that preterm birth has on  
97 father's mental health during this life stage and will help identify risk populations of fathers,  
98 inform service planning and lead to more targeted interventions to support fathers. It will also  
99 provide researchers with an opportunity to identify areas where future research is needed.  
100 Given the lack of clarity around the current knowledge and the potential impact of preterm  
101 birth on father's mental health, a systematic review is both timely and warranted.

102 To our knowledge, no systematic review to date has summarized the evidence from studies  
103 assessing PTB and adverse paternal mental health outcomes during the perinatal period.  
104 Therefore, the aim of this systematic review was to identify, critically evaluate and summarise  
105 studies that explored PTB and paternal mental health during the perinatal period.

106 The objectives for this review will be to identify a) what paternal mental health outcomes  
107 have been assessed; b) how paternal mental health outcomes were measured; c) the  
108 levels/prevalence of paternal mental health outcomes; d) the impact of paternal mental

109 health outcomes in relation to their health and social relationships and e) interventions and  
110 strategies used to manage paternal mental health outcomes. We hypothesize that the  
111 association between preterm birth and adverse mental health of fathers during the perinatal  
112 period will be confirmed, but methodological differences among the studies might impact on  
113 the results.

## 114 **Methods**

### 115 **Study design**

116 A systematic review of peer reviewed literature with respect of paternal mental health  
117 during the perinatal period, if possible a meta-analysis, will be performed in accordance  
118 with the Preferred Report Items for Systematic Reviews and Meta-analyses (PRISMA)  
119 statement. The PRISMA protocols (PRISMA – P) checklist [16] was used to prepare this  
120 protocol (S1 table).

### 121 **Eligibility criteria and information sources**

122 Inclusion and exclusion criteria are listed in table 1. Electronic searches of literature will be  
123 carried out using the following databases: Medline, CINAHL, the Cochrane Library,  
124 PsycARTICLES, PsycINFO, Psychology and Behavioural Sciences Collections. No date limit will  
125 be applied to the searches.

|                        | <b>Inclusion</b>                              | <b>Exclusion</b>                                                                                       |
|------------------------|-----------------------------------------------|--------------------------------------------------------------------------------------------------------|
| <b>Population</b>      | Fathers in the perinatal period               | Fathers not in the perinatal period                                                                    |
| Design                 | Quantitative studies of any design            | Qualitative studies of any design                                                                      |
| Language               | English                                       | Non-English                                                                                            |
| Availability           | Full text available                           | No full text available                                                                                 |
| Assessment             | Peer reviewed articles                        | Non-peer reviewed articles, grey literature                                                            |
| Methods (intervention) | Preterm birth during the perinatal period if: | <ul style="list-style-type: none"><li>• preterm birth and fathers' mental health was not the</li></ul> |

|  |                                                                                                                                                                                                                                                                          |                                                                                                                                                                                                                                                                                                                             |
|--|--------------------------------------------------------------------------------------------------------------------------------------------------------------------------------------------------------------------------------------------------------------------------|-----------------------------------------------------------------------------------------------------------------------------------------------------------------------------------------------------------------------------------------------------------------------------------------------------------------------------|
|  | <ul style="list-style-type: none"> <li>• fathers’ mental health was the principal focus of the research</li> <li>• fathers’ mental health was in the title and/or aim of the study</li> <li>• and fathers’ mental health was an outcome or dependent variable</li> </ul> | <p>main focus of the research</p> <ul style="list-style-type: none"> <li>• if only women were researched or if the data specific to men and women were not reported separately</li> <li>• if fathers’ mental health is not an outcome or a variable</li> <li>• if conducted after or before the perinatal period</li> </ul> |
|--|--------------------------------------------------------------------------------------------------------------------------------------------------------------------------------------------------------------------------------------------------------------------------|-----------------------------------------------------------------------------------------------------------------------------------------------------------------------------------------------------------------------------------------------------------------------------------------------------------------------------|

126 **Table 1: inclusion and exclusion criteria**

127 **Search strategy**

128 Search terms to be used are listed in table 2. The search strategy will include the Boolean  
 129 terms “OR”/ “AND” and truncation (\*). Phrase searching (“”) will also be used. Keywords  
 130 and search terms are demonstrated in Table 2.

| Intervention terms     | Search terms                                                                                                                                                                                                                                                                                                                                                                                                                                               |
|------------------------|------------------------------------------------------------------------------------------------------------------------------------------------------------------------------------------------------------------------------------------------------------------------------------------------------------------------------------------------------------------------------------------------------------------------------------------------------------|
| Population: Father     | father* OR paternal OR dad* OR male OR men OR partner                                                                                                                                                                                                                                                                                                                                                                                                      |
| Population: Preterm    | ‘preterm infant’ OR ‘premature infant’ OR ‘preterm neonate’ OR ‘prematurity’ OR ‘low birth weight infant’ OR ‘very low birth weight infant’ OR ‘preterm birth’ OR ‘premature’ OR ‘preterm labor’ OR ‘gestational age’ OR ‘low birth weight’ OR ‘neonatal intensive care unit’ OR NICU OR neonatology OR ‘neonatal unit’                                                                                                                                    |
| Context: Perinatal     | prenatal OR prepartum OR antenatal OR antepartum OR perinatal OR peripartum OR postnatal OR postpartum OR preg* OR childbirth OR birth OR labour OR labor                                                                                                                                                                                                                                                                                                  |
| Outcome: Mental health | ‘mental health’ OR ‘mental disorders’ OR ‘mental health services’ OR ‘adjustment disorders’ OR ‘mental illness’ OR ‘mental disease’ OR ‘mental problem’ OR ‘adverse mental health’ OR ‘mental health symptoms’ OR distress OR psychiat* OR ‘mental health wellbeing’ OR ‘mental health well-being’ OR ‘stress’ OR ‘Anxiety’ OR ‘Depression’ OR ‘Post Traumatic Stress Disorder’ OR ‘PTSD’ OR ‘Obsessive Compulsive Disorder’ OR ‘OCD’ OR ‘Substance abuse’ |

131 **Table 2: list of search terms to be applied**

132

### 133 **Study selection**

134 Relevant studies will be identified through electronic database searching, which utilizes the  
135 search terms. The relevant studies from the databases will be exported to Covidence and  
136 the duplicates will be removed. Two independent researchers (LP and IT) will initially screen  
137 the title and abstracts of the studies. The studies will be removed if they do not fit the  
138 inclusion criteria. After that, the full text of the remaining studies will be reviewed by two  
139 independent researchers (LP and IT) to choose the studies for the review. If there are any  
140 discrepancies, a third researcher (TT) will assess the studies to make the final decision. The  
141 study selection will be regulated and exhibited using a PRISMA flow diagram (Fig 1).

### 142 **Quality appraisal and risk of bias assessment**

143 The methodological quality of the included studies will be assessed by two researchers (EvD  
144 and FD'n) using the Joanna Briggs Institute (JBI) critical appraisal checklist for systematic  
145 review and research synthesis [15] and reported as per the Preferred Reporting Items for  
146 Systematic Reviews and Meta-analyses (PRISMA) [14]. Discrepancies will be resolved through  
147 mutual discussion and agreement. Considering the type of studies that will be included,  
148 various tools for assessing the risk of bias will be utilised.

### 149 **Data collection**

150 One author (LP) will extract the relevant data from the studies: author name and country,  
151 year of publication, study aim, study setting, study design, participant details and  
152 recruitments, type of adverse mental health outcome, findings and limitations. Another  
153 author will independently cross-check data extraction (IT). Discrepancies will be resolved by  
154 consensus. The data extraction tables are presented in Tables 1 (characteristics of each study)  
155 and Table 2 (findings and limitations of each study). Data analysis will be descriptive. If the

156 nature of the included studies allows, a meta-analysis will be undertaken. If the criteria for a  
157 meta-analysis are not met (i.e., heterogeneity in research designs, interventions, and  
158 outcome measures among studies) a narrative synthesis of the findings will be undertaken.

159

| Author name and country (year of publication) | Study aim and setting | Participants details and recruitments | Type and prevalence of adverse mental health measured | Measures and timepoints | Contributing factors | Impact of adverse mental health outcome |
|-----------------------------------------------|-----------------------|---------------------------------------|-------------------------------------------------------|-------------------------|----------------------|-----------------------------------------|
|-----------------------------------------------|-----------------------|---------------------------------------|-------------------------------------------------------|-------------------------|----------------------|-----------------------------------------|

160 **Table 3: Characteristics of each study**

161

| Author name and country (year of publication) | Key Findings | Limitations |
|-----------------------------------------------|--------------|-------------|
|-----------------------------------------------|--------------|-------------|

162 **Table 4: Findings and limitations of each study**

### 163 **Data synthesis**

164 The abstracted data from the selected studies will be synthesized and presented according  
165 to the primary aim and objectives of the review. Extracted data from eligible studies will be  
166 presented in evidence tables and a narrative synthesis will provide a summary of the  
167 prevalence of adverse paternal mental health related to preterm birth in the perinatal  
168 period, the contributing factors to adverse mental health outcomes, the measurement tools  
169 used to assess adverse mental health outcomes, the time point/s when adverse mental  
170 health outcomes were measured during the perinatal period and what  
171 interventions/strategies are available for fathers to manage and address adverse mental  
172 health outcomes.

173

174

## 175 **Ethics and dissemination**

176 The review will not require ethical approval and the findings will be published in a peer  
177 reviewed journal using the PRISMA guidelines and presented orally at an International  
178 research conference.

## 179 **Discussion**

180 Fatherhood can be complex and challenging [4], in particular when experiencing a PTB [5].  
181 PTB has been associated with symptoms of depression, anxiety and stress [8] However,  
182 systematic reviews about the impact of PTB on father's mental health are lacking.  
183 Therefore, this review aimed to identify, critically evaluate and summarize studies that  
184 explored PTB and paternal mental health and wellbeing during the perinatal period,  
185 including outcomes, measuring instruments, prevalence, impact and interventions. The  
186 rigorous and transparent methodology of this systematic review will result in a better  
187 understanding of the potential impact of PTB on fathers' mental health and lead to more  
188 targeted interventions to support fathers during this life stage.

## 189 **Supporting information**

190 S1 Table. PRISMA-P 2015 checklist.

191 S2 JBI CRITICAL APPRAISAL CHECKLIST FOR SYSTEMATIC REVIEWS AND  
192 RESEARCH SYNTHESSES

193

## 194 **Author contributions**

195 **Conceptualization:** LP and IT

196 **Investigation:** LP, IT, TT, EvD and FD'h

197 **Methodology:** LP, IT, TT, EvD and FD'h

198 **Project administration:** LP anPLOS one

199 d IT

200 **Supervision:** LP and IT

201 **Validation:** LP, IT, TT, EvD and FD'h

202 **Writing – original draft:** LP, IT, TT, EvD and FD'h

203 **Writing – review & editing:** LP, IT, TT, EvD and FD'h

204

## 205 **References**

- 206 1) Philpott, L. F. Paternal perinatal mental health: progress, challenges and future  
207 direction. *Trends in Urology & Men's Health*. 2023; 14(5), 14-18.
- 208 2) Leach, L.S, Poyser C., Cooklin, A.R., and Giallo R. Prevalence and course of anxiety  
209 disorders (and symptom levels) in men across the perinatal period: a systematic  
210 review. *Journal of Affective Disorders* 2016;190:675–86.
- 211 3) Philpott, L.F. The coexistence of paternal stress, anxiety, and depression symptoms  
212 in ireland during the early postnatal period. 2022; *Int J Mens Soc Community Health*  
213 5:e33–e46.
- 214 4) Philpott, L.F., Leahy-Warren, P., FitzGerald, S. and Savage E. Prevalence and  
215 associated factors of paternal stress, anxiety, and depression symptoms in the early  
216 postnatal period. *Global Mental Health*. 2022;9:306-321.
- 217 5) Holm, K.G., Aagaard, H., Maastrup, R., Weis, J., Feenstra, M.M., Haslund-Thomsen,  
218 H., Hägi-Pedersen, M.B., Nilsson, I., Kristensen, I.H., Dreier, S. and Brødsgaard, A.  
219 How to support fathers of preterm infants in early parenthood—an integrative  
220 review. *Journal of Pediatric Nursing*. 2022; 67, pp.e38-e47.
- 221 6) Walani, S.R. Global burden of preterm birth. *International Journal of of Gynecology*  
222 *and obstetrics*. 2020; 150(1), 31-33.
- 223 7) da Fonseca, E.B., Damião, R., Moreira, D.A. Preterm birth prevention. *Best Practice &*  
224 *Research Clinical Obstetrics & Gynaecology*. 2020; 69, 40-49.
- 225 8) Treyvaud, K., Spittle, A., Anderson, P.J. and O'Brien, K. A multilayered approach is  
226 needed in the NICU to support parents after the preterm birth of their infant. *Early*  
227 *Hum Dev*. 2019; 139:104838.

- 228 9) de Paula Eduardo, J.A.F., de Rezende, M.G., Menezes, P.R. and Del-Ben CM. Preterm  
229 birth as a risk factor for postpartum depression: A systematic review and meta-  
230 analysis. *Journal of Affective Disorders*. 2019; 1;259:392-403.
- 231 10) McMahon, G.E., Anderson, P.J., Giallo, R., Pace, C.C., Cheong, J.L., Doyle, L.W.,  
232 Spittle, A.J., Spencer-Smith, M.M. and, Treyvaud, K. Mental Health Trajectories of  
233 Fathers Following Very Preterm Birth: Associations With Parenting, *Journal of*  
234 *Pediatric Psychology*. August 2020; volume 45, Issue 7, Pages 725–735,
- 235 11) Philpott, L.F., FitzGerald, S., Savage, E. and Leahy-Warren, P. Anxiety in fathers in the  
236 perinatal period: a systematic review. *Midwifery* 2019;76:54–101.
- 237 12) Philpott LF, Leahy-Warren P, FitzGerald S, Savage E. Stress in fathers in the perinatal  
238 period: a systematic review. *Midwifery* 2017;55:113–27
- 239 13) Cameron, E.E., Sedov, I.D. and Tomfohr-Madsen, L.M. Prevalence of paternal  
240 depression in pregnancy and the postpartum: an updated meta-analysis. *Journal of*  
241 *Affective Disorders* 2016;206:189–203.
- 242 14) Moher, D., Liberat, A., Tetzlaff, J., Altman, D.G. Preferred reporting items for  
243 systematic reviews and meta-analyses: the PRISMA statement. *Annals of Internal*  
244 *Medicine*. 2009; 151, 264–269.
- 245 15) Aromataris E, Fernandez R, Godfrey C, Holly C, Kahlil H, Tungpunkom P. Summarizing  
246 systematic reviews: methodological development, conduct and reporting of an  
247 Umbrella review approach. *Int J Evid Based Healthc*. 2015;13(3):132-40.
- 248 16) Moher D, Shamseer L, Clarke M, et al. Preferred reporting items for systematic  
249 review and meta-analysis protocols (PRISMA-P) 2015 statement. *Systematic reviews*.  
250 2015;4:1.
